# Supplementary material for: Self-Assembled Generation of Multi-zonal Liver Organoids from Human Pluripotent Stem Cells
Source: PubMed Central journal article supplement — bioRxiv. 2024 Aug 30:2024.08.30.610426. Preprint. [Version 1] doi: 10.1101/2024.08.30.610426 (PMC11384014; doi:10.1101/2024.08.30.610426), 2024-08-30
Supplement: NIHPP2024.08.30.610426v1-supplement-1.pdf [file NIHPP2024.08.30.610426v1-supplement-1.pdf]

**Table S1:** List of antibodies used for immunostaining (IC), ELISA, and ChIP-seq (ChIP) in organoid experiment.

| Antibody         | Host   | Source         | Catalog #  | Dilution  | Method  |
|------------------|--------|----------------|------------|-----------|---------|
| EP300 ChIP Grade | Rabbit | abcam          | ab14984    | 5 $\mu$ g | ChIP    |
| ACSS2            | Rabbit | abcam          | ab66038    | 5 $\mu$ g | ChIP    |
| ALDH6A1          | Rabbit | abcam          | Ab126218   | 5 $\mu$ g | ChIP    |
| CPS1             | Rabbit | abcam          | ab45956    | 1:200     | IF      |
| ACSS2            | Mouse  | Sigma-Aldrich  | SAB1401767 | 1:200     | IF      |
| GLUL             | Mouse  | Sigma-Aldrich  | MAB302     | 1:200     | IF, IHC |
| GLUL             | Mouse  | abcam          | ab273647   | 1:200     | IF      |
| NR3C1            | Rabbit | Invitrogen     | PA1-511A   | 1:200     | IF      |
| CDH1             | Goat   | R&D            | AF648      | 1:200     | IF      |
| ZO-1             | Mouse  | BD Biosciences | 610966     | 1:200     | IF      |
| CTNNB1           | Rabbit | Santa Cruz     | sc-7199    | 1:200     | IF      |
| MRP2             | Rabbit | Santa Cruz     | Sc-20766   | 1:200     | IF, IHC |
| TUBA1A           | Mouse  | abcam          | ab11304    | 1:200     | IF, IHC |
| SLBP             | Rabbit | Atlas          | HPA061670  | 1:200     | IF, IHC |
| CK7              | Mouse  | abcam          | ab9021     | 1:200     | IF, IHC |
| ARG1             | Rabbit | abcam          | ab91279    | 1:200     | IF, IHC |
| ARG1             | Rabbit | abcam          | ab133543   | 1:200     | IF      |
| TERT             | Rabbit | abcam          | ab32020    | 1:200     | IF, IHC |
| AHR              | Rabbit | Atlas          | HPA029723  | 1:200     | IF, IHC |
| ALDH6A1          | Mouse  | Novus          | NBP2-52410 | 1:200     | IF      |
| HNF4A            | Rabbit | Abcam          | ab200142   | 1:200     | IF      |
| GLS2             | Rabbit | Atlas          | HPA038608  | 1:200     | IF, IHC |
| PROX1            | Goat   | R&D            | AF2727     | 1:200     | IF      |
| A1AT             | Rabbit | Atlas          | HPA000927  | 1:200     | IF      |

|                    |        |            |           |           |       |
|--------------------|--------|------------|-----------|-----------|-------|
| CEBPB              | Mouse  | Santa Cruz | Sc-7962   | 1:200     | IF    |
| AR                 | Mouse  | Agilent    | M3562     | 1;200     | IF    |
| GHR                | Rabbit | Atlas      | HPA057705 | 1:200     | IF    |
| TET1               | Mouse  | GeneTex    | GTX627420 | 1:200     | IF    |
| mCherry            | Rabbit | abcam      | ab167453  | 1:200     | IF    |
| ALB                | Mouse  | R&D        | MAB1455   | 1:200     | IF    |
| ALB                | Goat   | Bethyl     | A80-129A  | 1 $\mu$ g | ELISA |
| HNF1A              | Rabbit | Atlas      | HPA035231 | 1:200     | IF    |
| normal IgG control | Rabbit | abcam      | ab37415   | 5 $\mu$ g | ChIP  |

**Table S2:** List of TaqMan probes used for qPCR

| Gene           | Gene name                                              | TaqMan probe (Catalog #) |
|----------------|--------------------------------------------------------|--------------------------|
| <i>ACSS2</i>   | Acyl-coenzyme A synthetase short-chain family member 2 | Hs01122829_m1            |
| <i>ALB</i>     | Albumin                                                | Hs00609411_m1            |
| <i>FAH</i>     | Fumarylacetoacetate hydrolase                          | Hs00164611_m1            |
| <i>ASL</i>     | Argininosuccinate lyase                                | Hs00902699_m1            |
| <i>CPS1</i>    | Carbamoyl phosphate synthase                           | Hs00157048_m1            |
| <i>OTC</i>     | Ornithine transcarbamylase                             | Hs00166892_m1            |
| <i>ALDH1A2</i> | Aldehyde dehydrogenase 1 family member A2              | Hs00180254_m1            |
| <i>ALDH6A1</i> | Aldehyde dehydrogenase 6 family member A1              | Hs00194421_m1            |
| <i>GLUL</i>    | Glutamine synthetase                                   | Hs00365928_g1            |
| <i>HIF1A</i>   | Hypoxia-inducible factor 1-alpha                       | Hs00153153_m1            |
| <i>SREBF1</i>  | Sterol regulatory element-binding protein 1            | Hs02561944_s1            |
| <i>ARG1</i>    | Arginase 1                                             | Hs00163660_m1            |
| <i>GSTA2</i>   | Glutathione S-transferase A2                           | Hs00747232_mH            |

**Table S3:** List of Custom primers used for ChIP-PCR

| Orientation            | Sequence               |
|------------------------|------------------------|
| Forward <i>ACSS2</i>   | CTGGGGTGTTCAGTGAGGAGAA |
| Reverse <i>ACSS2</i>   | TTCACTCTCTTGGCCGACCT   |
| Forward <i>ALDH6A1</i> | GGTCCGAACACCTGATTCCT   |
| Reverse <i>ALDH6A1</i> | CCTTACGCGGATGTTGAGGT   |

**Table S4:** List of Custom primers used for ChIP-qPCR

| Orientation            | Sequence                                       |
|------------------------|------------------------------------------------|
| Forward <i>ACSS2</i>   | GGAGGTTCTGTGAAGGAAGAAT                         |
| Probe <i>ACSS2</i>     | /56-FAM/AAAGGGATT/ZEN/CCGGGAGGAGACGAG/3IABkFQ/ |
| Reverse <i>ACSS2</i>   | CTCCAAGTCTGCAGGGAAC                            |
| Forward <i>ALDH6A1</i> | GTAGGCGGAGGTAGAGAAGA                           |
| Probe <i>ALDH6A1</i>   | /56-FAM/CCTGACTTG/ZEN/GACACTCCCTACCGA/3IABkFQ/ |

|                        |                       |
|------------------------|-----------------------|
| Reverse <i>ALDH6A1</i> | CAATCGGAGTTCCAGGTTAGG |
|------------------------|-----------------------|
